# Supplementary material for: Quantification of major and trace elements in fluid inclusions and gas bubbles by laser ablation inductively coupled plasma mass spectrometry (LA-ICP-MS) with no internal standard: a new method
Source: Copernicus journal article supplement (doi:10.5194/ejm-33-305-2021), 2021-06-02
Supplement: Supplementary file 1 [file ejm-33-305-2021-supplement.zip]

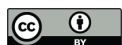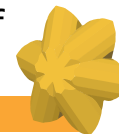

*Supplement of*

**Quantification of major and trace elements in fluid inclusions and gas bubbles by laser ablation inductively coupled plasma mass spectrometry (LA-ICP-MS) with no internal standard: a new method**

**Anastassia Y. Borisova et al.**

*Correspondence to:* Anastassia Y. Borisova ([anastassia.borisova@get.omp.eu](mailto:anastassia.borisova@get.omp.eu))

- [ejm-33-305-2021-supplement-title-page.pdf](#)
- [Supplement 1.xls](#)
- [Supplement 2.xls](#)
- [Table S1.xls](#)

The copyright of individual parts of the supplement might differ from the article licence.
